# Supplementary material for: ITGA5 Is a Novel Oncogenic Biomarker and Correlates With Tumor Immune Microenvironment in Gliomas
Source: Front Oncol. 2022 Mar 18;12:844144. doi: 10.3389/fonc.2022.844144 (PMC8971292; doi:10.3389/fonc.2022.844144)
Supplement: Supplementary Table 1 — Specific information of the patients and the corresponding platforms. [file Table_1.xlsx]

## Sheet: Sheet1
sample
